# Supplementary material for: Electrically bioactive coating on Ti with bi-layered SnO2–TiO2 hetero-structure for improving osteointegration
Source: Royal Society of Chemistry journal article supplement (doi:10.1039/c8tb00709h), 2018-01-01
Supplement: c8tb00709h1.pdf [file c8tb00709h1.pdf]

## Electronic Supplementary Information (ESI)

### **Electrically bioactive coating on Ti with bi-layered SnO<sub>2</sub>-TiO<sub>2</sub> hetero-structure for improving osteointegration**

Rui Zhou <sup>a,e</sup>, Yong Han <sup>a,\*</sup>, Jianyun Cao <sup>b</sup>, Ming Li <sup>c</sup>, Guorui Jin <sup>d</sup>, Haoteng Luo <sup>a</sup>, Lizhai Zhang <sup>a</sup>,  
Bo Su <sup>e,\*</sup>

a State Key Laboratory for Mechanical Behavior of Materials, Xi'an Jiaotong University, Xi'an 710049, China

b School of Materials, University of Manchester, Manchester M13 9PL, UK

c Honghui Hospital, Xi'an Jiaotong University College of Medicine, Xi'an 710054, P.R. China

d Bioinspired Engineering and Biomechanics Center, Xi'an Jiaotong University, Xi'an 710049, P.R. China

e Bristol Dental School, University of Bristol, Bristol BS1 2LY, UK

Corresponding Author

\* Yong Han. E-mail: [yonghan@xjtu.edu.cn](mailto:yonghan@xjtu.edu.cn)

\* Bo Su. E-mail: [b.su@bristol.ac.uk](mailto:b.su@bristol.ac.uk)

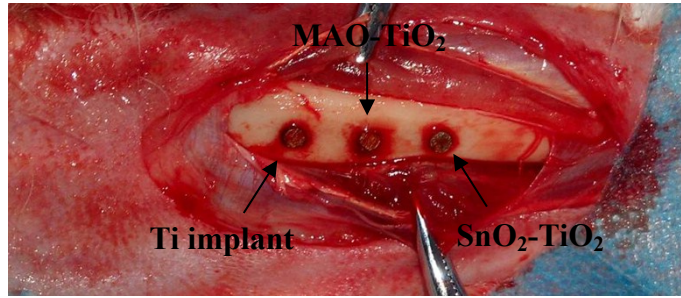

**Fig. S1** Image of implants placed tibia during animal surgery.

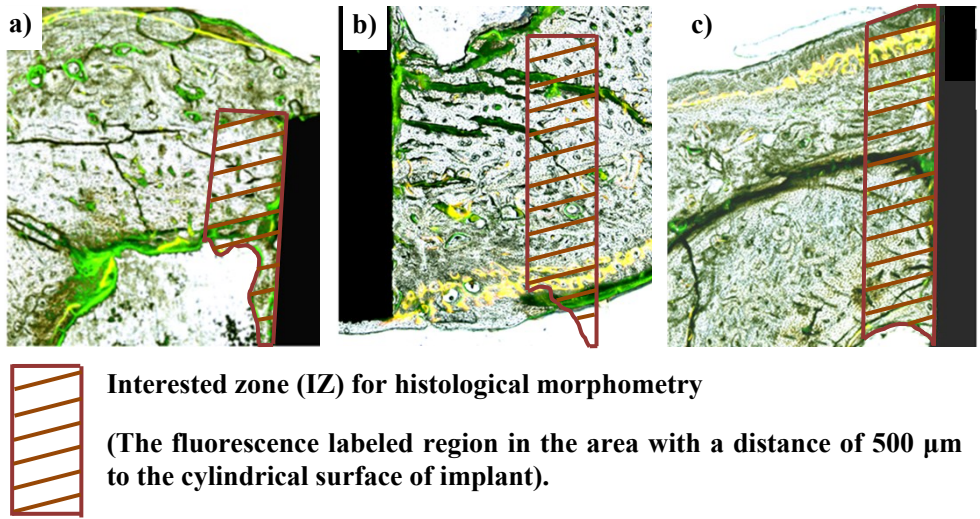

**Fig. S2** Schematic diagram for the histological morphometry of the histological images with fluorescence labeling: (a) Ti implant, (b) MAO-TiO<sub>2</sub>, and (c) SnO<sub>2</sub>-TiO<sub>2</sub>.

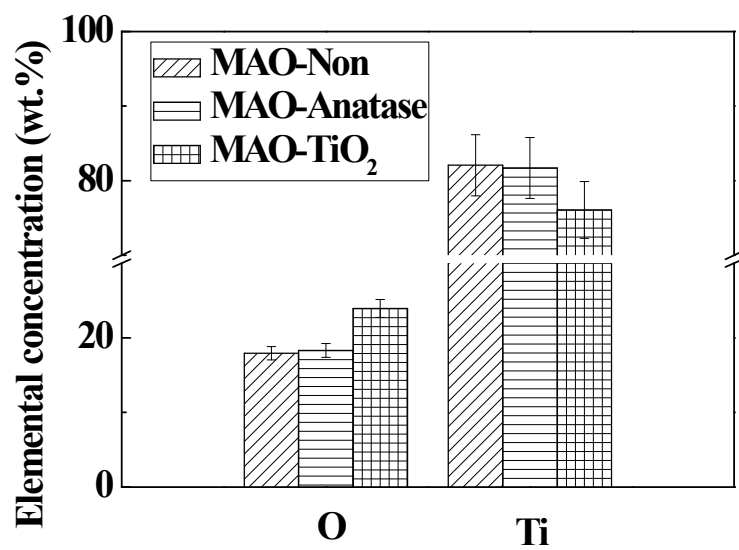

**Fig. S3** Surface elemental concentration of the MAO coated samples.

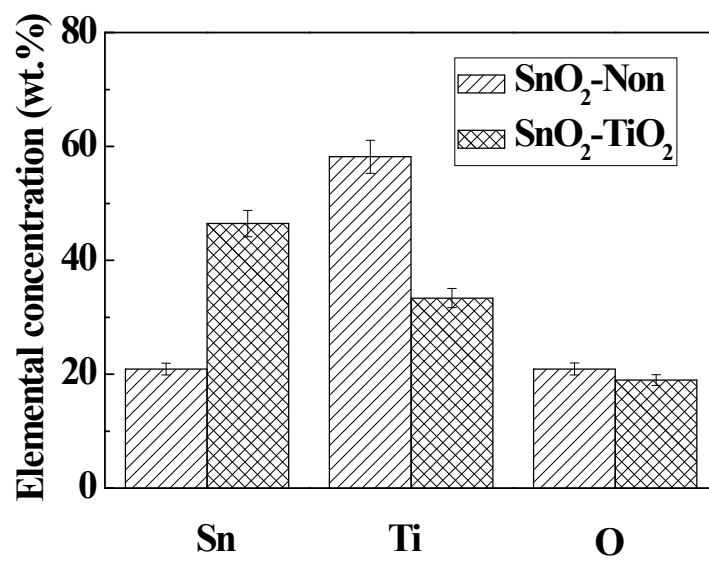

**Fig. S4** Surface elemental concentration of the SnO<sub>2</sub>-Non and SnO<sub>2</sub>-TiO<sub>2</sub>.

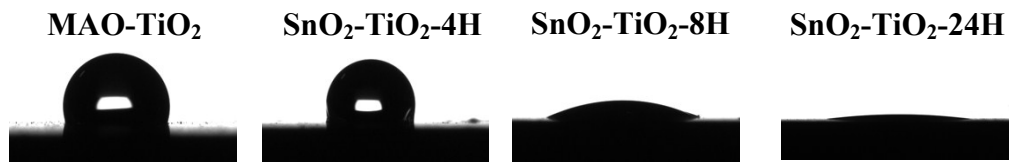

**Fig.S5** The CAs of SnO<sub>2</sub>-TiO<sub>2</sub> surface with different soaking time during the hydrothermal treatment.

**Table S1.** Sample code based on phase composition from XRD results.

| Sample code                        | Phase composition                            | Treatment                             |
|------------------------------------|----------------------------------------------|---------------------------------------|
| MAO-Non                            | Amorphous TiO <sub>x</sub>                   | MAO at 250 V                          |
| MAO-Anatase                        | Anatase                                      | MAO at 350 V                          |
| MAO-TiO <sub>2</sub>               | TiO <sub>2</sub> (Anatase+Rutile)            | MAO at 450 V                          |
| SnO <sub>2</sub> -Non              | SnO <sub>2</sub> +Amorphous TiO <sub>x</sub> | MAO at 250 V + Hydrothermal treatment |
| SnO <sub>2</sub> -Anatase          | SnO <sub>2</sub> +Anatase                    | MAO at 350 V + Hydrothermal treatment |
| SnO <sub>2</sub> -TiO <sub>2</sub> | SnO <sub>2</sub> +TiO <sub>2</sub>           | MAO at 450 V + Hydrothermal treatment |

**Table S2.** Comparison of enhancement in push out test of the implant fabricated by different modified strategies.

| Strategy                                 | Preparation method                          | Mechanical testing method | Control groups             | Healing time | Enhancement          | Ref.       |
|------------------------------------------|---------------------------------------------|---------------------------|----------------------------|--------------|----------------------|------------|
| Nano-topographic stimulation             | Acid etch                                   | Push-out force            | Ti                         | 12 weeks     | 2 times              | 52         |
| Nano-topographic & Chemical stimulation  | Anodizing & Drug laden                      | Push-shear bond strength  | Ti-32Nb-5Zr                | 4 weeks      | 7 times              | 53         |
| Micro-topographic & Chemical stimulation | Microarc oxidation & HA deposition          | Pull-out tests            | Microarc oxidized Ti       | 4 weeks      | 2 times              | 54         |
| Modulus matching                         | Low modulus alloy                           | Push-in test              | Ti                         | 4 weeks      | 0.9 times            | 55         |
| Nano-topographic & Chemical stimulation  | Anodizing & ions doping                     | Pull-out test             | Ti                         | 12 weeks     | 4 times              | 56         |
| Electric & Nano-topographic stimulation  | Microarc oxidation & Hydrothermal treatment | Push-out force            | Ti<br>Microarc oxidized Ti | 4 weeks      | 7 times<br>2.5 times | This study |
